# Supplementary material
Source: PubMed Central journal article supplement (PMC6108918)

**A**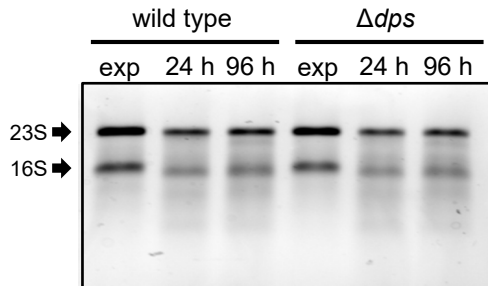**B**

Total aligned read pairs

| Growth | Strain       | Reads      |
|--------|--------------|------------|
| 24 h   | wild type    | 13,391,525 |
| 24 h   | $\Delta dps$ | 24,614,915 |
| 96 h   | wild type    | 11,657,456 |
| 96 h   | $\Delta dps$ | 16,792,528 |

**C**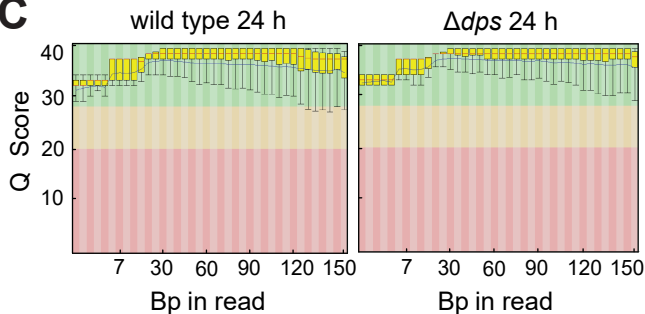**D**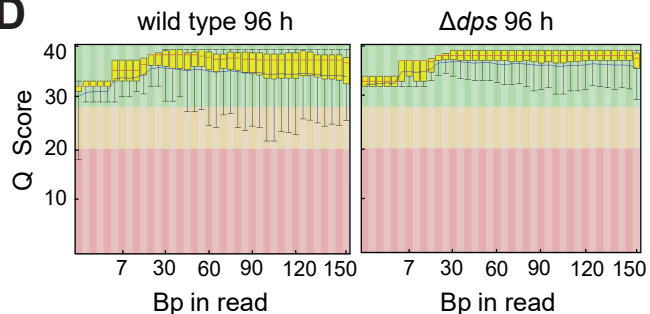**E**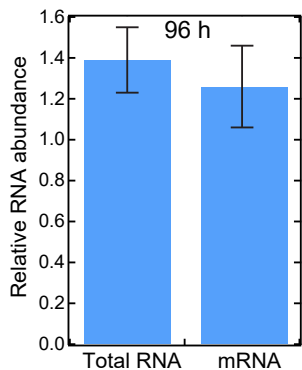**F**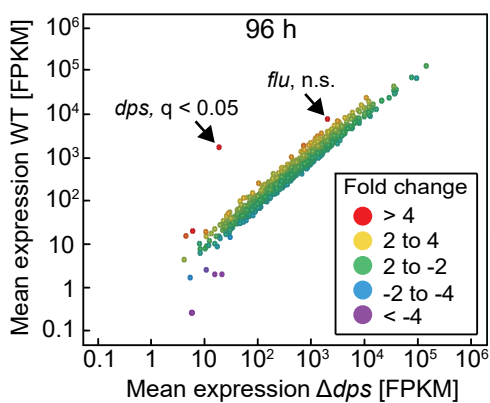**G**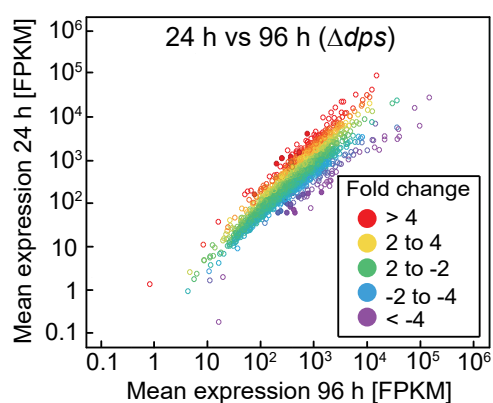

Supplement: NIHMS978711-supplement-2.pdf [file NIHMS978711-supplement-2.pdf]
