# Supplementary material
Source: PubMed Central journal article supplement (PMC6108918)

**A**

-35
-10
+1

*recA* GAATTCCAAAACAC TTGATA-CTGTATGAGCATACAG TATAATTGCTTCCGGTACCCTCTGCGTTCCGTGC  
KpnI

*rrnB* P1 TTTTAAATTTCTCT TTGTCAGGCCGGAATAACTCCC-TATAATGCGCCACC-ACTGACACGAAAGCTTGGGTCC  
HindIII

$\lambda$  P<sub>R</sub> TAACACCGTGCCT GTTGACTATTTTACCTCTGGCGGT GATAATGGTTGC---ATGTAGTAAGGAGGTTGTAT  
HincII

*flu* CGTTACTGTCTCT TTGTCCGTGCAATAGCTCAATAA TAGAATAAAACG---ATCAATATCTATTTTATCGA

**B**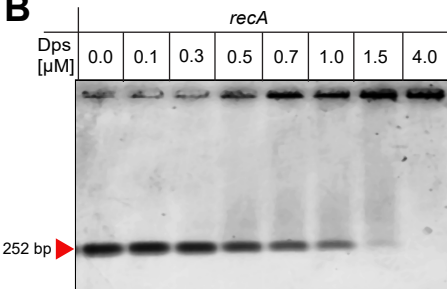**C**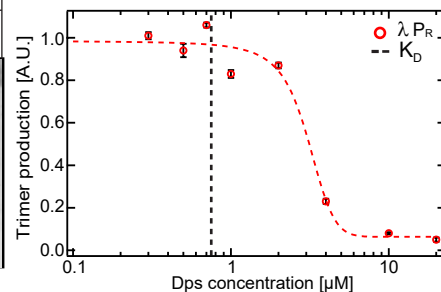**D**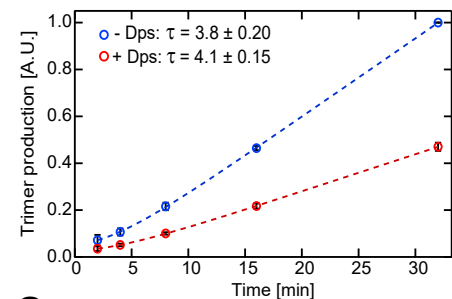**E**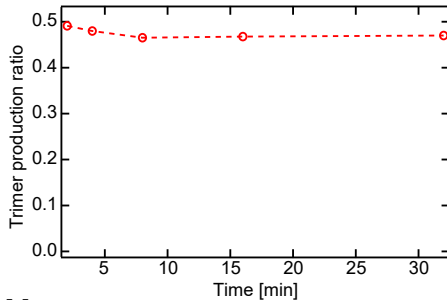**F**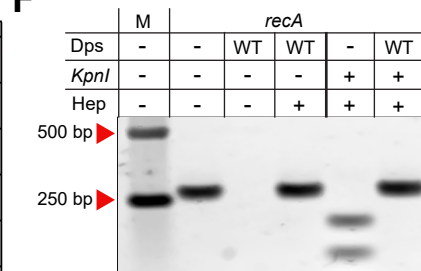**G**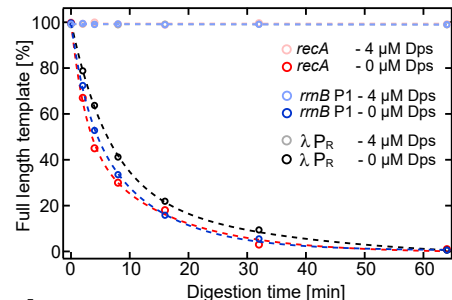**H**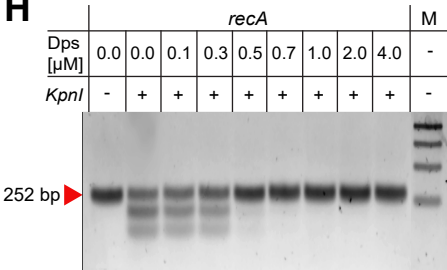**I**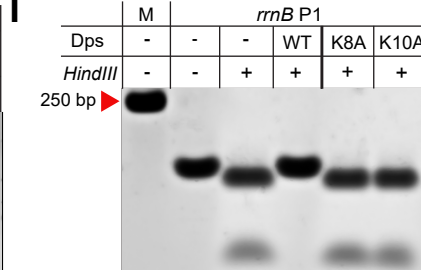**J**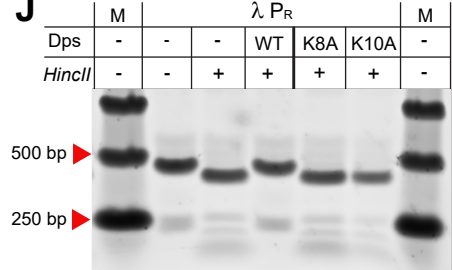

Supplement: NIHMS978711-supplement-4.pdf [file NIHMS978711-supplement-4.pdf]
