# Supplementary material
Source: PubMed Central journal article supplement (PMC6108918)
Supplement: NIHMS978711-supplement-8.pdf [file NIHMS978711-supplement-8.pdf]

**Table S1:** Biochemical properties of *in vitro* Dps binding to linear DNA sequences containing the promoter sequences *recA* (252 bp), *fluP* (401 bp),  $\lambda$  P<sub>R</sub> (483 bp), and *rrnB* P1 (120 bp). Mean apparent  $K_D$  and mean Hill coefficients were calculated based on the analysis of gel-shift assays performed for each DNA template. Related to **Figure 3**.

| Template                 | Mean apparent $K_D \pm$ SEM [ $\mu$ M] | Mean Hill Coef. $\pm$ SEM |
|--------------------------|----------------------------------------|---------------------------|
| <i>recA</i>              | $0.54 \pm 0.06$                        | $3.33 \pm 0.31$           |
| <i>rrnB</i> P1           | $0.57 \pm 0.04$                        | $2.97 \pm 0.17$           |
| <i>flu</i>               | $0.64 \pm 0.03$                        | $3.10 \pm 0.11$           |
| $\lambda$ P <sub>R</sub> | $0.77 \pm 0.04$                        | $3.29 \pm 0.18$           |

**Table S2:** Statistics of single-molecule transcription experiments. Denoted are the number of traces, dwell times measured, average elongation rates, and pause probabilities (SP = short pause lengths between 1 - 5 s; LP = long pause lengths between 5 – 100 s), respectively, for each type of single-molecule transcription experiment. Related to **Figure 5**.

|                        | AF                | AF + Dps          | OF                | OF + Dps          |
|------------------------|-------------------|-------------------|-------------------|-------------------|
| <i>N</i>               | 76                | 47                | 49                | 38                |
| Dwell times            | 12,839            | 7,341             | 5,687             | 4,339             |
| Elongation rate [nt/s] | $26.6 \pm 0.3$    | $26.3 \pm 0.4$    | $23.5 \pm 0.3$    | $22.7 \pm 0.5$    |
| SP probability         | $0.36 \pm 0.006$  | $0.37 \pm 0.008$  | $0.44 \pm 0.01$   | $0.43 \pm 0.01$   |
| LP probability         | $0.024 \pm 0.003$ | $0.025 \pm 0.003$ | $0.038 \pm 0.005$ | $0.029 \pm 0.005$ |

**Table S3:** Primer sequences used for the production of DNA tether constructs. Related to STAR Methods section.

| Oligonucleotide | Sequence                                      |
|-----------------|-----------------------------------------------|
| 1               | 5'- GACCGAGATAGGGTTGAGTG                      |
| 2               | 5'- CCATCTTGGTCTCCCCTACGCTCTAGAACTAGTGGATCCCC |
| 3               | 5'- CCATCTTGGTCTCCTAGGCGTCAGCCTGCGAAGCAGTGGC  |
| 4               | 5'- CCATCTTGGTCTCCTGTCAACACCACTTTGCTCCGAGGTT  |
| 5               | 5'- CCATCTTGGTCTCCGACAGCGCCATTCGCCATTCAGGCTG  |
| 6               | 5'- CTTCTGCTTTCCTGATGCAAAAAC                  |
| 7               | 5'- CTGCGGTCTCGCCCGACCGGCTCCAGATTTATCAGC      |
| 8               | 5'- CTGCGGTCTCGTCAAAAACCTGGAACAACACTCAACCC    |
| 9               | 5'- CTGCGGTCTCGTAGGAGGCGCCATTCGCCATTCAGG      |
| 10              | 5'- CTGCGGTCTCGCCGGGTTGCAGCACTGGGGCCAGATG     |
| 11              | 5'- GACCGAGATAGGGTTGAGTG                      |
| 12              | 5'- CAGGGTCGGAACAGGAGAGC                      |
| 13              | 5'- CTGCGGTCTCGCCCGACCGGCTCCAGATTTATCAGC      |
| 14              | 5'- CTGCGGTCTCGTCAATTACGCGCAGCGTGACCGCTAC     |
| 15              | 5'- CTGCGGTCTCGTAGGCCGATTTAGAGCTTGACGGGG      |
| 16              | 5'- CTGCGGTCTCGCGGGTTCAGCACTGGGGCCAGATG       |

**Table S4:** Primer sequences used for the production of DNA promoter templates. Related to STAR Methods section.

| Oligonucleotide                 | Sequence                              |
|---------------------------------|---------------------------------------|
| <i>rrnB</i> P1 pIA536           | 5'- TCAGGAATTCGAACGCGGTCAGAAAATTATTTT |
| <i>rrnB</i> P1 pIA536           | 5'- GTTCGGCATGGGGTCAGGTG              |
| $\lambda$ Pr pIA1240            | 5'- CGTTAAATCTATCACCGCAAGG            |
| $\lambda$ Pr pIA1240            | 5'- CAGTTCCTACTCTCGCATG               |
| <i>recA</i> pIA1222             | 5'- GTAACGACGGCCAGT                   |
| <i>recA</i> pIA1222             | 5'- ATTACGAATTCGCGAGAGACATCG          |
| <i>Pflu E. coli</i> genomic DNA | 5'- ATTTTCTTCTGAACCTGTCGTG            |
| <i>Pflu E. coli</i> genomic DNA | 5'- ACGAAAGCGCCCGTCATGTG              |
