# Supplementary material
Source: PubMed Central journal article supplement (PMC6108918)

**A**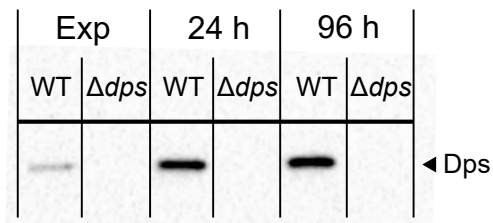**B**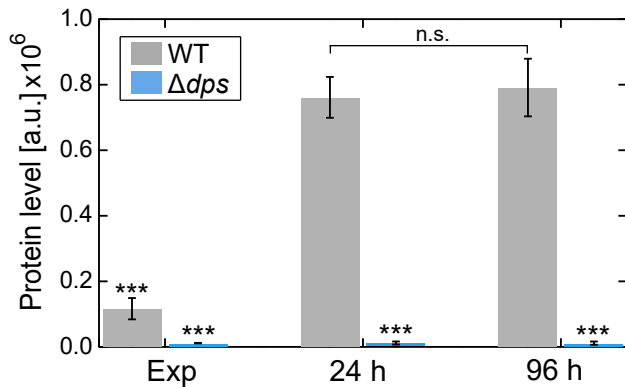**C**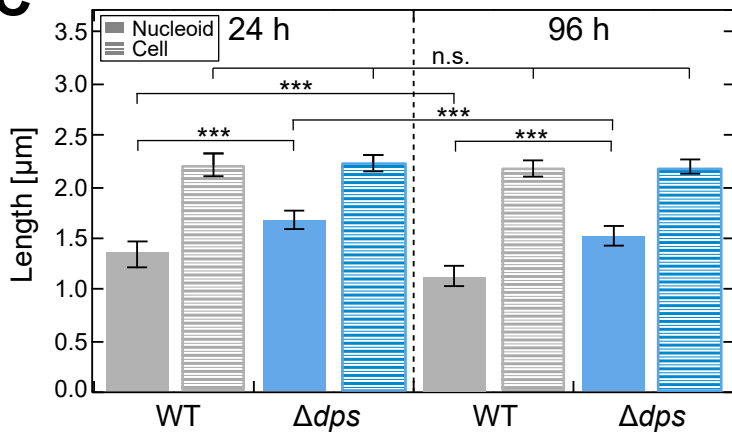

Supplement: NIHMS978711-supplement-1.pdf [file NIHMS978711-supplement-1.pdf]

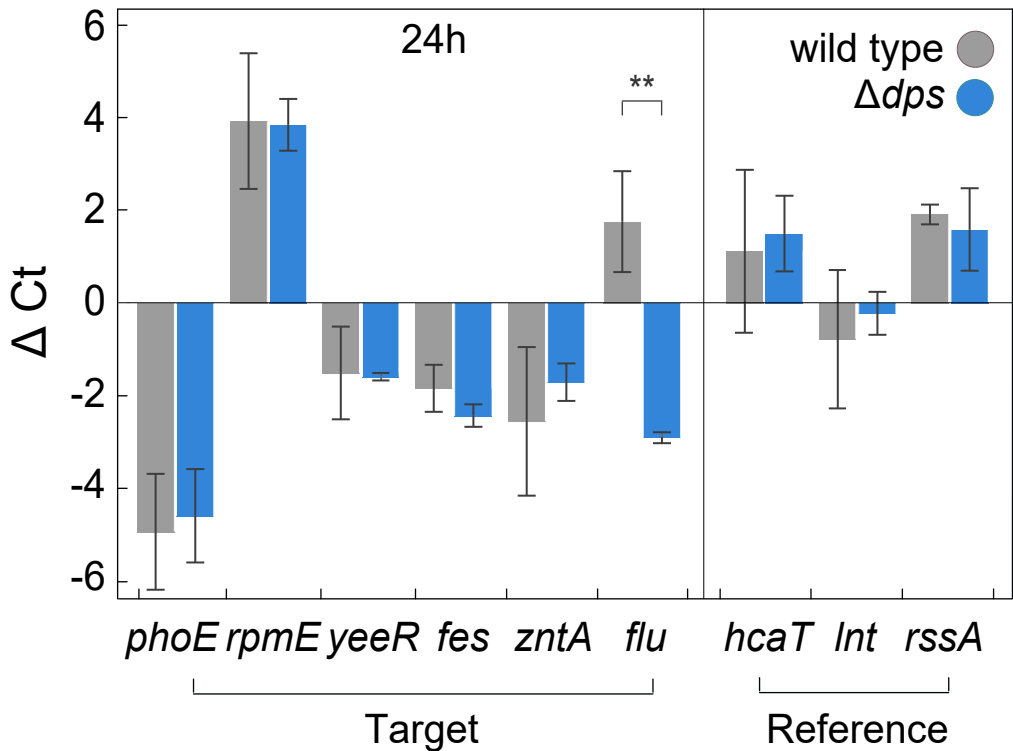

Supplement: NIHMS978711-supplement-3.pdf [file NIHMS978711-supplement-3.pdf]

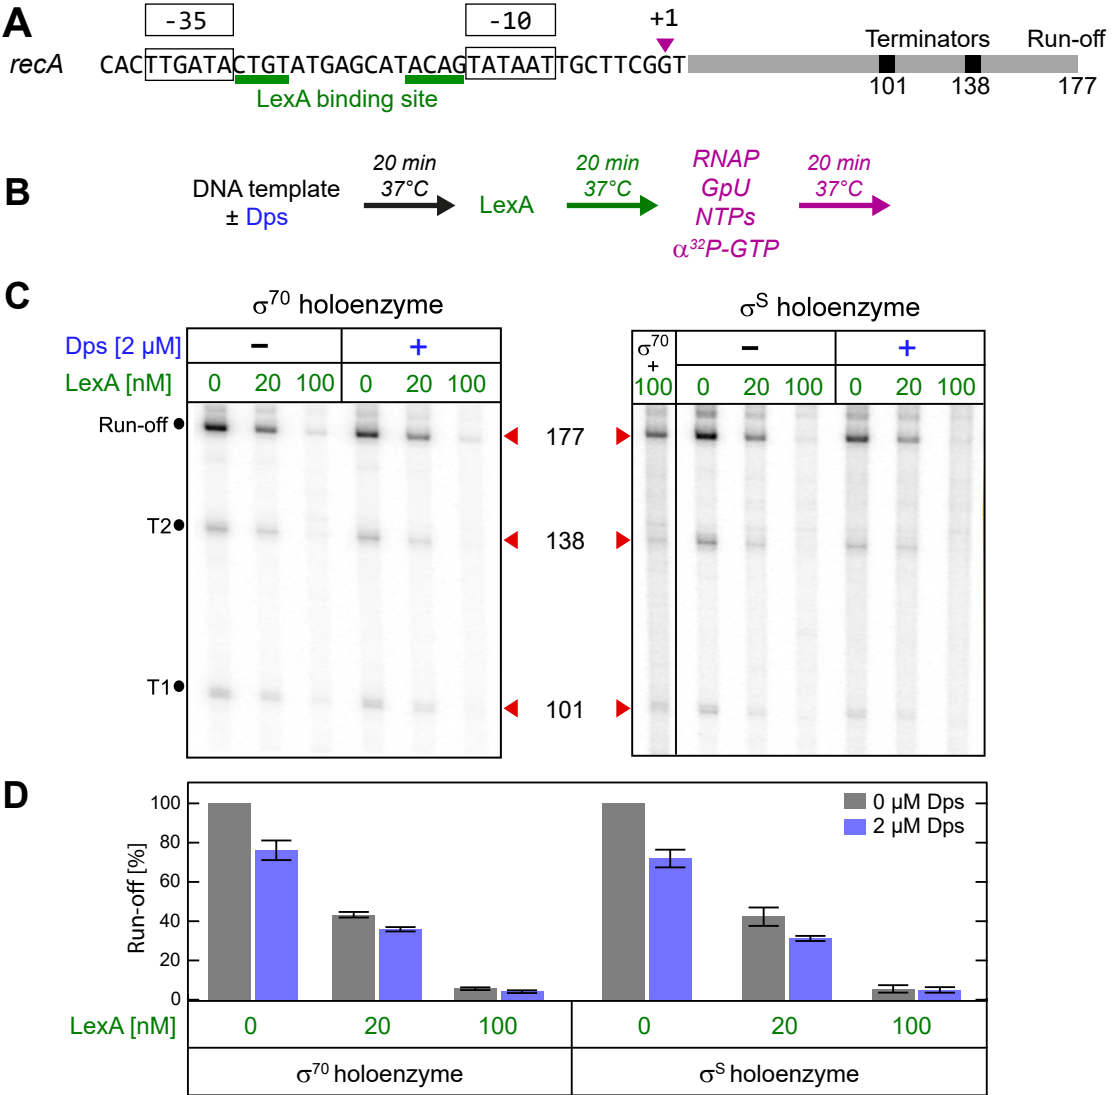

Supplement: NIHMS978711-supplement-5.pdf [file NIHMS978711-supplement-5.pdf]

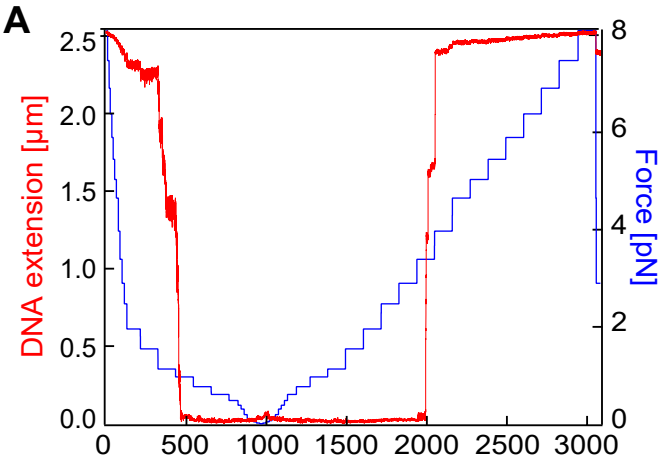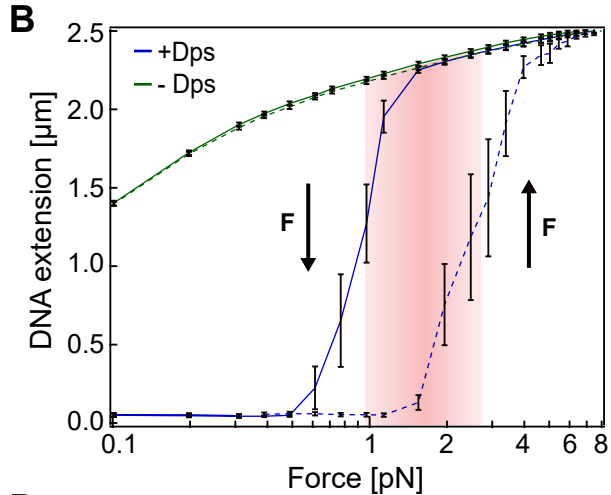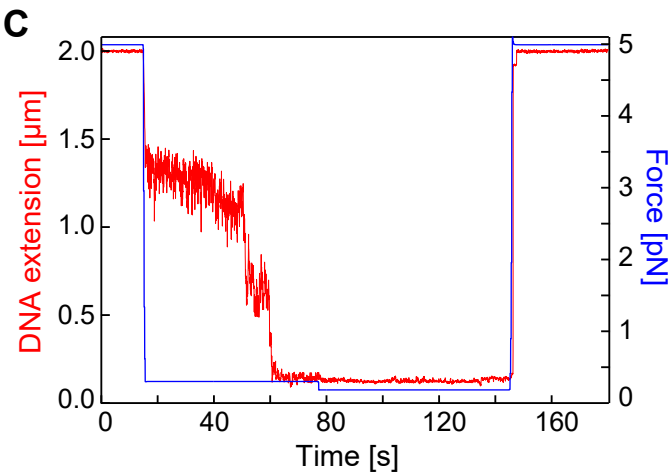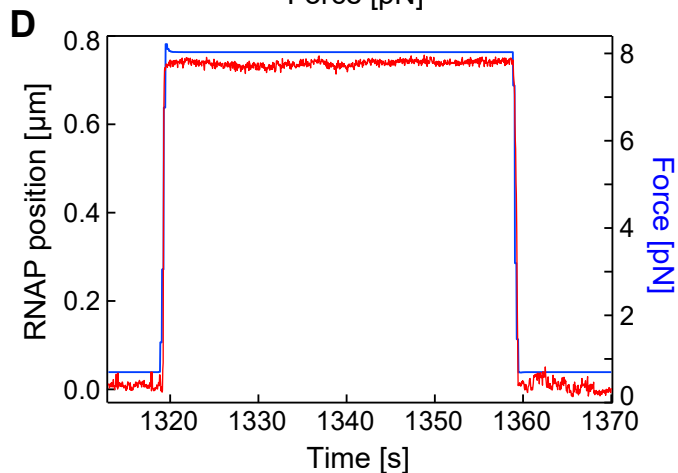

Supplement: NIHMS978711-supplement-6.pdf [file NIHMS978711-supplement-6.pdf]

**A**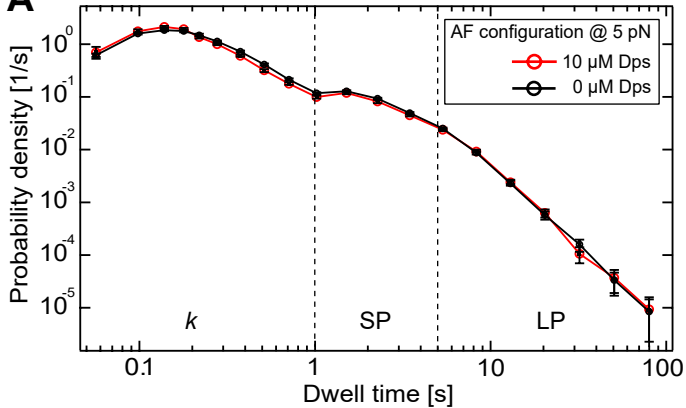**B**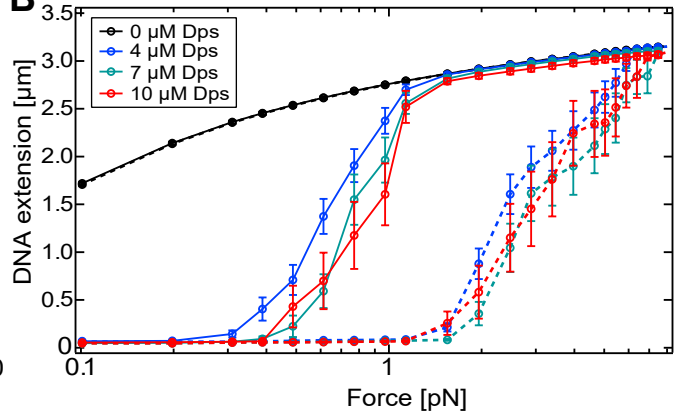

Supplement: NIHMS978711-supplement-7.pdf [file NIHMS978711-supplement-7.pdf]
